# Supplementary material
Source: publisher figshare collection journal article supplement (https://brill.figshare.com/ndownloader/files/40782758)
Supplement: Supplementary file 1 [file 40782758]

The gator grapnel: pedal anchoring in the American alligator (*Alligator mississippiensis*)

Collin Walter, Michael Cramberg, Bruce A. Young\*

Department of Anatomy, Kirksville College of Osteopathic Medicine, Kirksville, MO 63501,

USA

\*Corresponding author; e-mail: byoung@atsu.edu

ORCID iD: Young: 0000-0002-0988-7731

**Supplementary material**

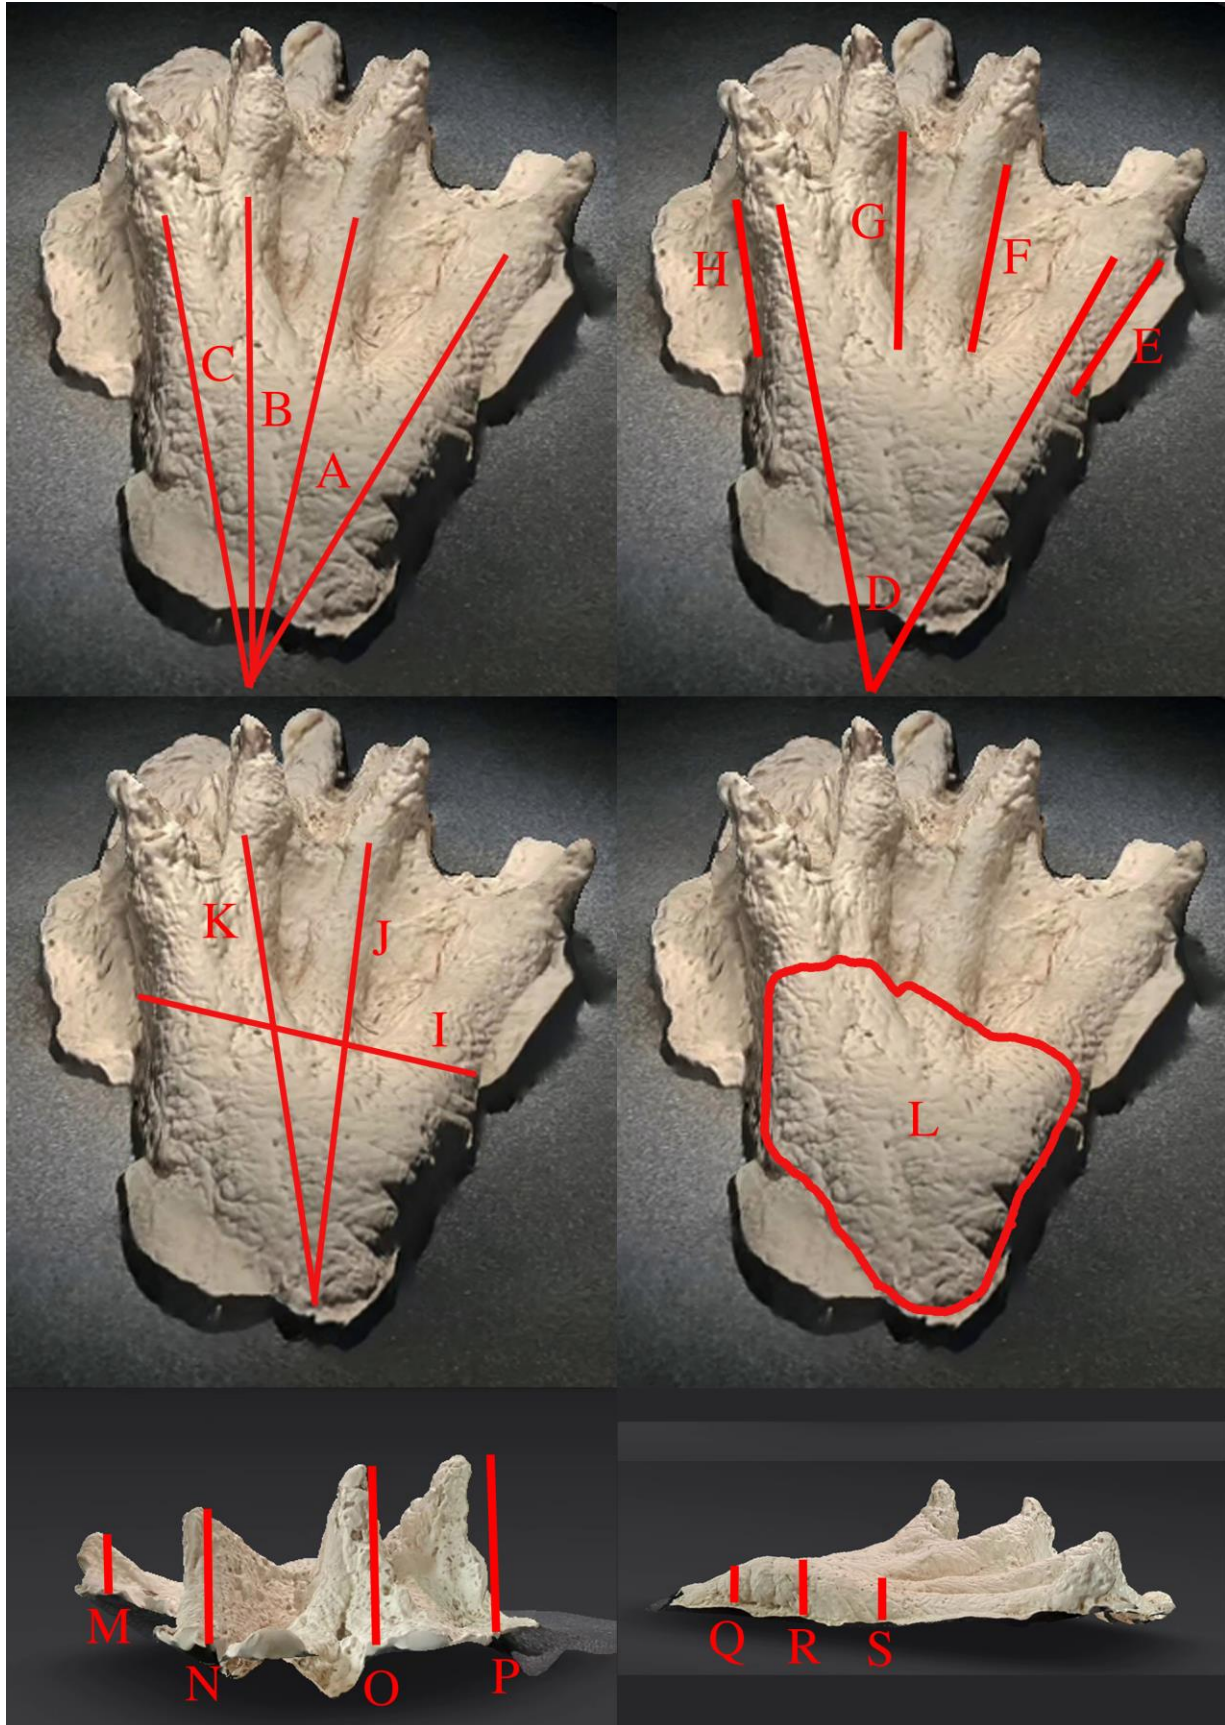

**Figure S1.** Illustration of the measurements taken from each pes cast. A) Angle between digits 1 and 2; B) angle between digits 2 and 3; C) angle between digits 3 and 4; D) angle between the medial and lateral digits; E) horizontal length of digit 1; F) horizontal length of digit 2; G) horizontal length of digit 3; H) horizontal length of digit 4; I) medial to lateral span of digits; J) distance from base of pad to horizontal end of digit 2; K) distance from base of pad to horizontal end of digit 3; L) area of the plantar pad; M) vertical length of digit 1; N) vertical length of digit 2; O) vertical length of digit 3; P) vertical length of digit 4; Q) depth of pad base; R) depth of mid pad; S) depth of pad at base of digit 2.

**Video S1.** Video clip of a 187 cm total length *Alligator mississippiensis* walking over the mud trackway. You can see the clear tracks behind the alligator.

**Table S1.** Summary of the MANOVA on the pes locomotor casts. The range of each feature from the casts taken in the wild is presented, as is the mean and standard deviation (s.d.) from the three data sets. The calculated F-statistic from the MANOVA is given, as is the corresponding probability ( $p$ ) value. The features that are significantly different are indicated in bold red; the specific differences identified by post-hoc testing are indicated by red symbols.

| Feature                                                       | Range           | Wild                           | Field            | Lab                           | Statistics                |
|---------------------------------------------------------------|-----------------|--------------------------------|------------------|-------------------------------|---------------------------|
|                                                               |                 | Mean, s.d.                     | Mean, s.d.       | Mean, s.d.                    | F, $p$                    |
| Angle between digits 1 and 2                                  | 2.74–19.98      | 9.23, 4.78                     | 14.35, 11.42     | 13.67, 8.40                   | 2.18, 0.125               |
| Angle between digits 2 and 3                                  | 6.54–27.78      | 14.14, 6.24                    | 17.52, 7.57      | 13.26, 6.01                   | 1.34, 0.271               |
| Angle between digits 3 and 4                                  | 6.07–25.84      | 15.12, 5.37                    | 12.06, 6.23      | 15.14, 4.98                   | 1.12, 0.335               |
| Angle between the medial and lateral digits                   | 24.0–54.74      | 37.49, 9.36                    | 42.69, 21.68     | 42.46, 11.49                  | 0.94, 0.398               |
| Horizontal length of digit 1                                  | 24.14–63.89     | 41.71, 14.01                   | 36.69, 10.23     | 38.06, 11.87                  | 0.65, 0.524               |
| <b>Horizontal length of digit 2</b>                           | 40.28–102.17    | 73.49, 20.95* <sup>^</sup>     | 45.78, 22.36*    | 53.24, 14.85 <sup>^</sup>     | <b>7.92, 0.0011</b>       |
| <b>Horizontal length of digit 3</b>                           | 44.48–108.76    | 73.94, 18.59* <sup>^</sup>     | 55.17, 15.45*    | 60.36, 17.76 <sup>^</sup>     | <b>7.39, 0.0016</b>       |
| Horizontal length of digit 4                                  | 19.36–71.01     | 46.40, 14.05                   | 32.70, 13.60     | 43.99, 15.89                  | 2.54, 0.089               |
| Medial to lateral span of digits                              | 69.42–143.41    | 97.76, 22.68                   | 74.30, 8.15      | 93.5, 17.15                   | 4.62, 0.015               |
| <b>Distance from base of pad to horizontal end of digit 2</b> | 94.91–215.97    | 165.32, 27.03* <sup>^</sup>    | 99.57, 27.44*    | 121.27, 17.44 <sup>^</sup>    | <b>30.42, &lt;0.00001</b> |
| <b>Distance from base of pad to horizontal end of digit 3</b> | 109.12–215.84   | 164.74, 21.13* <sup>^</sup>    | 110.30, 25.80*   | 130.00, 16.28 <sup>^</sup>    | <b>27.30, &lt;0.00001</b> |
| <b>Area of the plantar pad</b>                                | 1586.09–7232.99 | 4728.34, 1514.27* <sup>^</sup> | 2318.37, 909.74* | 3192.22, 1432.88 <sup>^</sup> | <b>10.73, 0.0001</b>      |
| <b>Vertical length of digit 1</b>                             | 7.45–67.03      | 35.43, 17.71                   | 20.16, 5.87*     | 43.09, 10.13*                 | <b>8.96, 0.0005</b>       |
| Vertical length of digit 2                                    | 8.99–95.65      | 39.72, 22.19                   | 24.62, 8.72      | 43.74, 10.98                  | 4.18, 0.021               |
| Vertical length of digit 3                                    | 2.08–58.43      | 29.86, 17.85                   | 19.57, 7.47      | 32.81, 9.19                   | 3.13, 0.053               |
| Vertical length of digit 4                                    | 1.07–41.2       | 21.04, 15.27                   | 10.11, 7.36      | 17.65, 9.50                   | 2.69, 0.078               |
| <b>Depth of pad base</b>                                      | 9.24–50.27      | 21.90, 10.18* <sup>^</sup>     | 4.69, 3.61*      | 9.93, 5.16 <sup>^</sup>       | <b>21.06, &lt;0.00001</b> |
| <b>Depth of mid pad</b>                                       | 11.14–51.75     | 28.28, 11.22* <sup>^</sup>     | 7.30, 4.69*      | 15.40, 6.99 <sup>^</sup>      | <b>20.62, &lt;0.00001</b> |
| <b>Depth of pad at base of digit 2</b>                        | 14.14–53.48     | 24.28, 9.83*                   | 9.41, 3.23*      | 18.61, 7.84                   | <b>9.48, 0.0003</b>       |

**Table S2.** Summary of the t-test performed on the z-transformed data from the manus locomotor casts. The range of each feature from the casts taken in the wild is presented, as is the mean and standard deviation (s.d.) from the wild and laboratory sets. The calculated t-statistic is given, as is the corresponding probability (*p*) value. The features that are significantly different are indicated in bold red.

| Feature                                                | Wild            |                  | Lab             | Statistics           |
|--------------------------------------------------------|-----------------|------------------|-----------------|----------------------|
|                                                        | Range           | Mean, s.d.       | Mean, s.d.      | t, <i>p</i>          |
| Angle between digits 1 and 2                           | 21.4–74.75      | 48.28, 18.39     | 25.35, 25.67    | 0.097, 0.924         |
| Angle between digits 2 and 3                           | 8.51–58.09      | 33.41, 18.01     | 35.94, 10.10    | 0.456, 0.652         |
| Angle between digits 3 and 4                           | 17.15–49.37     | 33.65, 9.45      | 32.09, 9.95     | 0.403, 0.691         |
| Angle between digits 4 and 5                           | 19.71–44.13     | 33.84, 7.48      | 44.61, 18.26    | 1.667, 0.108         |
| Angle between the medial and lateral digits            | 70.78–165.85    | 116.05, 28.48    | 119.05, 27.07   | 0.273, 0.787         |
| Horizontal length of digit 1                           | 11.02–42.37     | 24.51, 11.66     | 12.11, 12.37    | 0.382, 0.709         |
| Horizontal length of digit 2                           | 14.96–45.71     | 29.91, 10.07     | 26.5, 7.90      | 0.968, 0.343         |
| Horizontal length of digit 3                           | 19.96–58.24     | 35.59, 12.18     | 31.79, 8.40     | 0.943, 0.356         |
| Horizontal length of digit 4                           | 15.68–51.19     | 32.12, 9.99      | 30.50, 8.30     | 0.451, 0.656         |
| Horizontal length of digit 5                           | 9.81–41.94      | 26.0, 11.67      | 19.45, 6.23     | 1.854, 0.076         |
| Medial to lateral span of digits                       | 65.05–126.71    | 99.53, 22.21     | 78.38, 12.24    | 3.112, 0.005         |
| Distance from base of pad to horizontal end of digit 2 | 42.87–92.1      | 71.38, 17.51     | 60.12, 10.88    | 2.021, 0.055         |
| Distance from base of pad to horizontal end of digit 3 | 54.53–121.99    | 85.87, 23.36     | 66.16, 11.63    | 2.835, 0.009         |
| <b>Area of the plantar pad</b>                         | 1126.98–4539.66 | 2572.12, 1230.99 | 1133.22, 303.41 | <b>4.379, 0.0002</b> |
| Vertical length of digit 1                             | 20.05–67.76     | 45.06, 14.95     | 23.66, 25.16    | 0.084, 0.935         |
| Vertical length of digit 2                             | 3.96–54.06      | 25.36, 14.37     | 38.60, 17.82    | 2.025, 0.054         |
| Vertical length of digit 3                             | 4.43–79.75      | 29.46, 19.97     | 35.81, 19.18    | 0.820, 0.420         |
| Vertical length of digit 4                             | 10.08–46.24     | 25.58, 12.62     | 27.64, 16.56    | 0.345, 0.733         |
| Vertical length of digit 5                             | 4.2–51.26       | 24.45, 16.28     | 23.59, 12.86    | 0.150, 0.882         |
| Depth of pad base                                      | 9.85–57.73      | 30.22, 14.70     | 21.65, 16.92    | 1.346, 0.191         |
| Depth of mid pad                                       | 16.46–65.8      | 35.87, 15.72     | 26.04, 17.07    | 1.499, 0.147         |
| Depth of pad at base of digit 2                        | 17.96–67.04     | 35.40, 14.18     | 29.07, 14.71    | 1.101, 0.282         |

**Table 3.** Summary of the t-test performed on the z-transformed data from the pes locomotor and pedal anchoring casts. The mean and standard deviation (s.d.) is given for both sets of casts, as is the calculated t-statistic and the corresponding probability (*p*) value. The features that were significantly different are indicated in bold red.

|                                                               | Walk             | Pedal Anchor    | Statistics               |
|---------------------------------------------------------------|------------------|-----------------|--------------------------|
| Feature                                                       | Mean, s.d.       | Mean, s.d.      | t, <i>p</i>              |
| Angle between digits 1 and 2                                  | 13.67, 8.40      | 5.96, 7.64      | 2.867, 0.007             |
| <b>Angle between digits 2 and 3</b>                           | 13.26, 6.01      | 6.49, 5.21      | <b>3.573, 0.001</b>      |
| <b>Angle between digits 3 and 4</b>                           | 15.14, 4.98      | 6.54, 5.46      | <b>5.004, &lt;0.0001</b> |
| <b>Angle between the medial and lateral digits</b>            | 42.46, 11.49     | 18.84, 16.43    | <b>5.224, &lt;0.0001</b> |
| Horizontal length of digit 1                                  | 38.06, 11.87     | 40.92, 11.28    | 0.741, 0.463             |
| Horizontal length of digit 2                                  | 53.24, 14.85     | 52.31, 9.79     | 0.215, 0.831             |
| Horizontal length of digit 3                                  | 60.36, 17.76     | 48.75, 8.06     | 2.369, 0.023             |
| Horizontal length of digit 4                                  | 43.99, 15.89     | 40.48, 8.05     | 0.789, 0.435             |
| <b>Medial to lateral span of digits</b>                       | 93.5, 17.15      | 71.88, 16.82    | <b>3.828, 0.0005</b>     |
| Distance from base of pad to horizontal end of digit 2        | 121.27, 17.44    | 108.32, 19.26   | 2.148, 0.038             |
| <b>Distance from base of pad to horizontal end of digit 3</b> | 130.00, 16.28    | 105.88, 10.39   | <b>5.09, &lt;0.0001</b>  |
| Area of the plantar pad                                       | 3192.22, 1432.88 | 2422.85, 615.30 | 1.958, 0.058             |
| Vertical length of digit 1                                    | 43.09, 10.13     | 46.57, 17.05    | 0.791, 0.434             |
| Vertical length of digit 2                                    | 43.74, 10.98     | 37.34, 19.89    | 1.278, 0.209             |
| Vertical length of digit 3                                    | 32.81, 9.19      | 33.08, 19.79    | 0.056, 0.956             |
| Vertical length of digit 4                                    | 17.65, 9.50      | 20.67, 13.54    | 0.809, 0.424             |
| Depth of pad base                                             | 9.93, 5.16       | 18.74, 12.97    | 2.938, 0.006             |
| Depth of mid pad                                              | 15.40, 6.99      | 24.70, 13.47    | 2.797, 0.008             |
| <b>Depth of pad at base of digit 2</b>                        | 18.61, 7.84      | 28.58, 10.86    | <b>3.288, 0.0023</b>     |

**Scan S1.** A 3-D scan of a locomotor pes cast.

**Scan S2.** A 3-D scan of a locomotor pes cast.

**Scan S3.** A 3-D scan of a pedal anchoring pes cast.

**Scan S4.** A 3-D scan of a pedal anchoring pes cast.
